# Supplementary material
Source: HighWire-hosted journal article supplement (https://rapm.bmj.com/content/rapm-2021-102705)
Supplement: inline-supplementary-material-1 [file inline-supplementary-material-1.pdf]

**Appendix A** – Search strategy for MEDLINE database.

- 1 IPack.kw. (7)
- 2 IPack.mp. (27)
- 3 (IPack adj10 block).mp. (20)
- 4 (interspace between the popliteal artery adj10 capsule of the posterior knee).mp. (4)
- 5 or/1-4 (27)
- 6 Adductor canal block.kw. (81)
- 7 (Adductor adj10 canal block).mp. (277)
- 8 adductor canal block.ti. (209)
- 9 or/6-8 (277)
- 10 5 and 9 (11)
- 11 exp Nerve Block/ (22237)
- 12 5 and 11 (8)
- 13 10 or 12 (17)
- 14 exp Arthroplasty, Replacement, Knee/ (23611)
- 15 Total knee.mp. (25263)
- 16 Knee\*.kw. (14552)
- 17 Total knee\*.kw. (4690)
- 18 exp Knee Joint/ (60116)
- 19 exp Knee Injuries/su [Surgery] (10973)
- 20 Knee arthroplasty.ab. /freq=2 (5205)
- 21 Joint Capsule/ (2062)
- 22 or/14-21 (99148)
- 23 13 and 22 (31)
- 24 limit 23 to english language (30)
- 25 remove duplicates from 24 (30)
