# Supplementary material
Source: HighWire-hosted journal article supplement (https://rapm.bmj.com/content/rapm-2021-102705)

**Appendix D** – Publication bias funnel Plots for rest pain scores at 6 hours post-operatively for a) Adductor canal block (ACB) versus ACB with Infiltration in the interspace between the popliteal artery and capsule of the knee (iPACK) in the *presence* of local infiltration analgesia (LIA) (circle dots) and b) ACB versus ACB with iPACK in the *absence* of LIA (diamond dots).

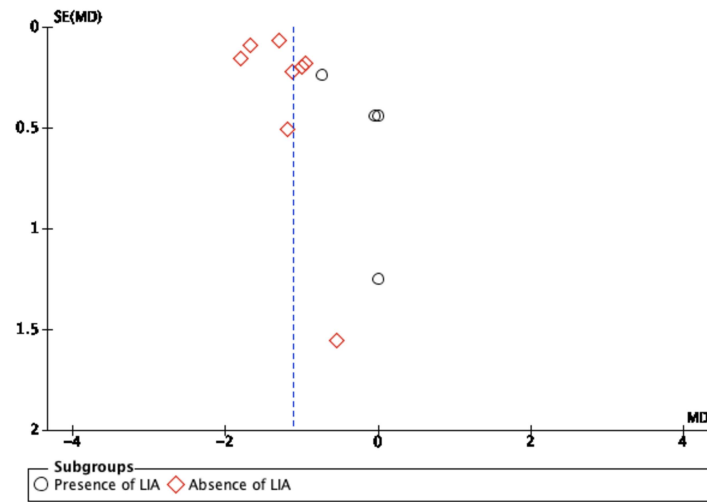

Supplement: inline-supplementary-material-4 [file inline-supplementary-material-4.pdf]
